# Supplementary material
Source: PubMed Central journal article supplement (PMC6986780)
Supplement: NIHMS1536023-supplement-2.pdf [file NIHMS1536023-supplement-2.pdf]

## SUPPLEMENTAL FIGURE 1

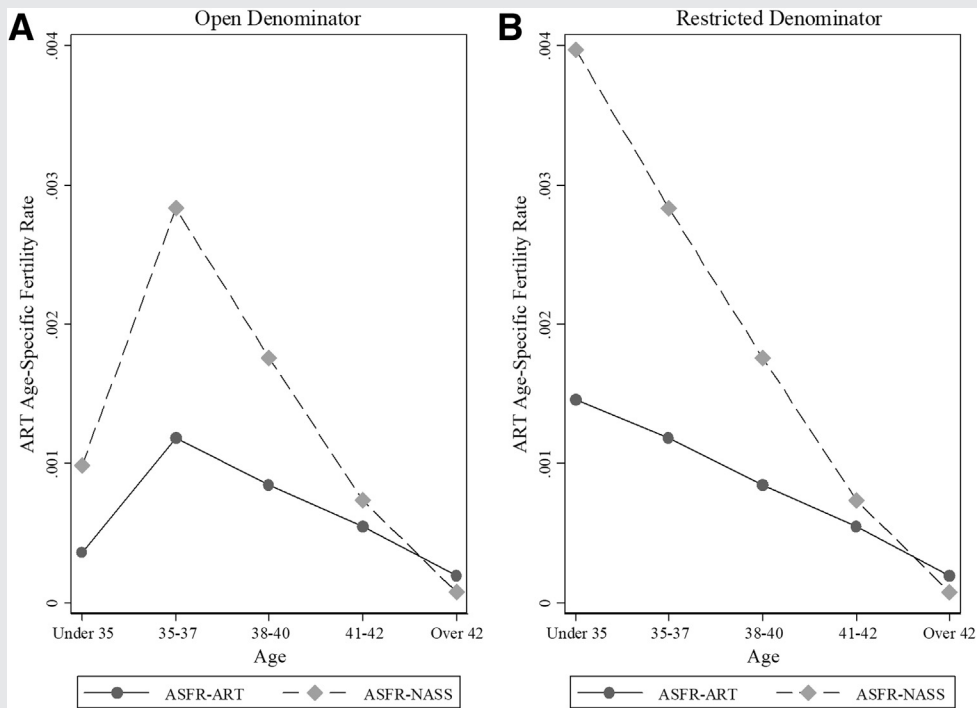

Comparison of the age-specific fertility rates of the National Vital Statistics System (NVSS) ART and National ART Surveillance System (NASS) data. (A) NASS does not report the number of live births or infants borne by age in the publicly available reports. However, the NASS reports provide information on the proportions of live births by age, which were used to estimate the counts of ART births in the NASS data. The birth counts were adjusted to exclude the proportion of births in states that do not report ART on birth certificates, and the denominators were matched to exclude nonreporting states. (B) Data for 2010 were insufficiently detailed to use for estimating births by age, and data for 2017 has not yet been released. (C) Births using donor eggs or embryos are distributed following nondonor age distributions for births with the exception of 2011, where data on donor eggs is insufficiently detailed to accurately calculate total number of live births. In **panel A**, the denominator for the under-35 age group includes women aged 15–34. In **panel B**, the denominator for the under-35 group includes women aged 30–34 only. In **panel B**, the NVSS data include ART births to women under 30 because we could not remove these births from the NASS data, so this allows a better comparison between the rates.

Tierney. ART use: a population assessment. *Fertil Steril* 2019.

**SUPPLEMENTAL FIGURE 2**

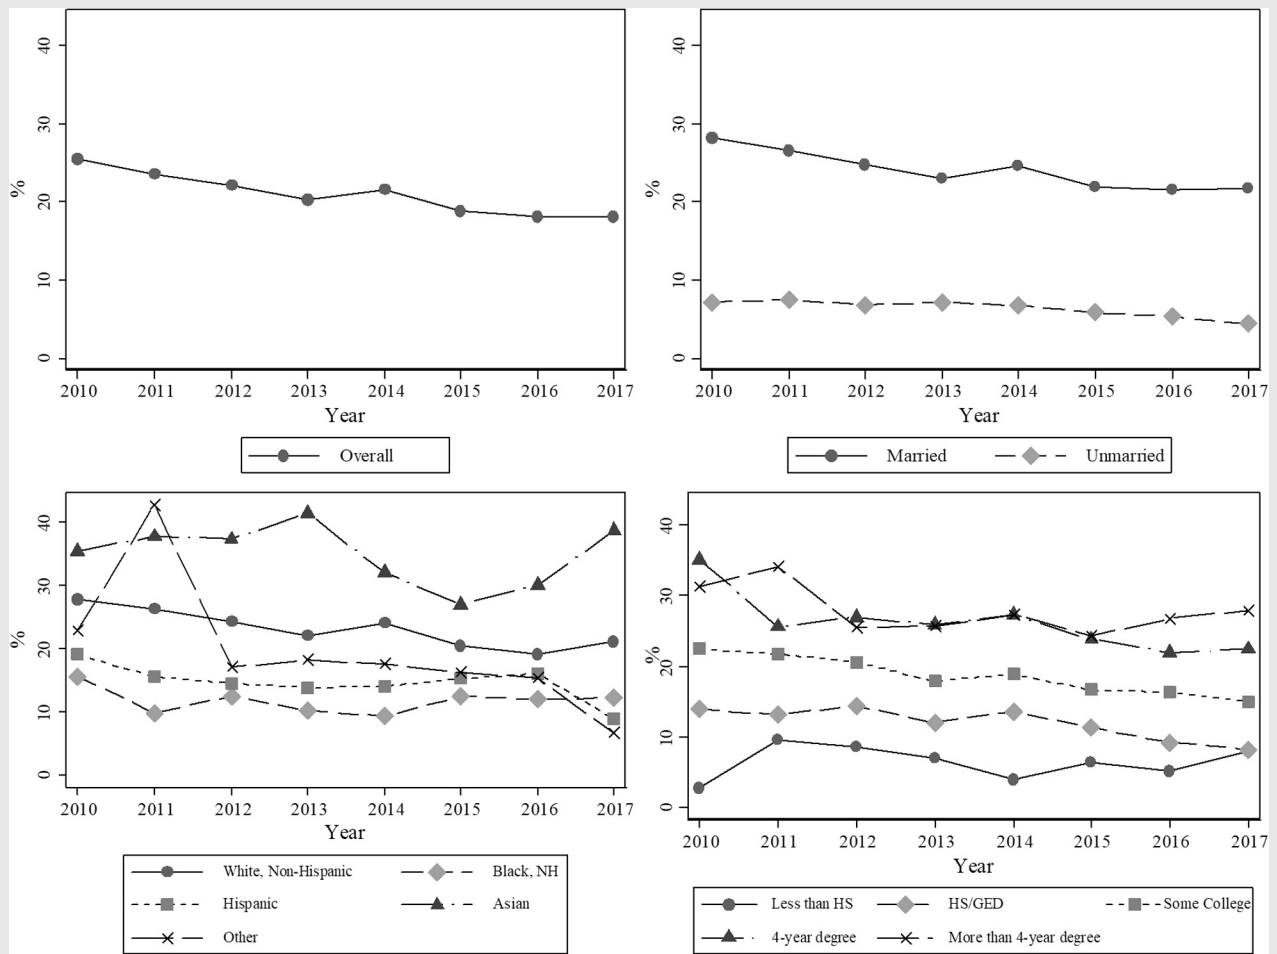

Percentage of fertility after age 30 due to ART overall and by race, marital status, and education including only triplet and higher order births. Tierney. ART use: a population assessment. *Fertil Steril* 2019.

**SUPPLEMENTAL FIGURE 3**

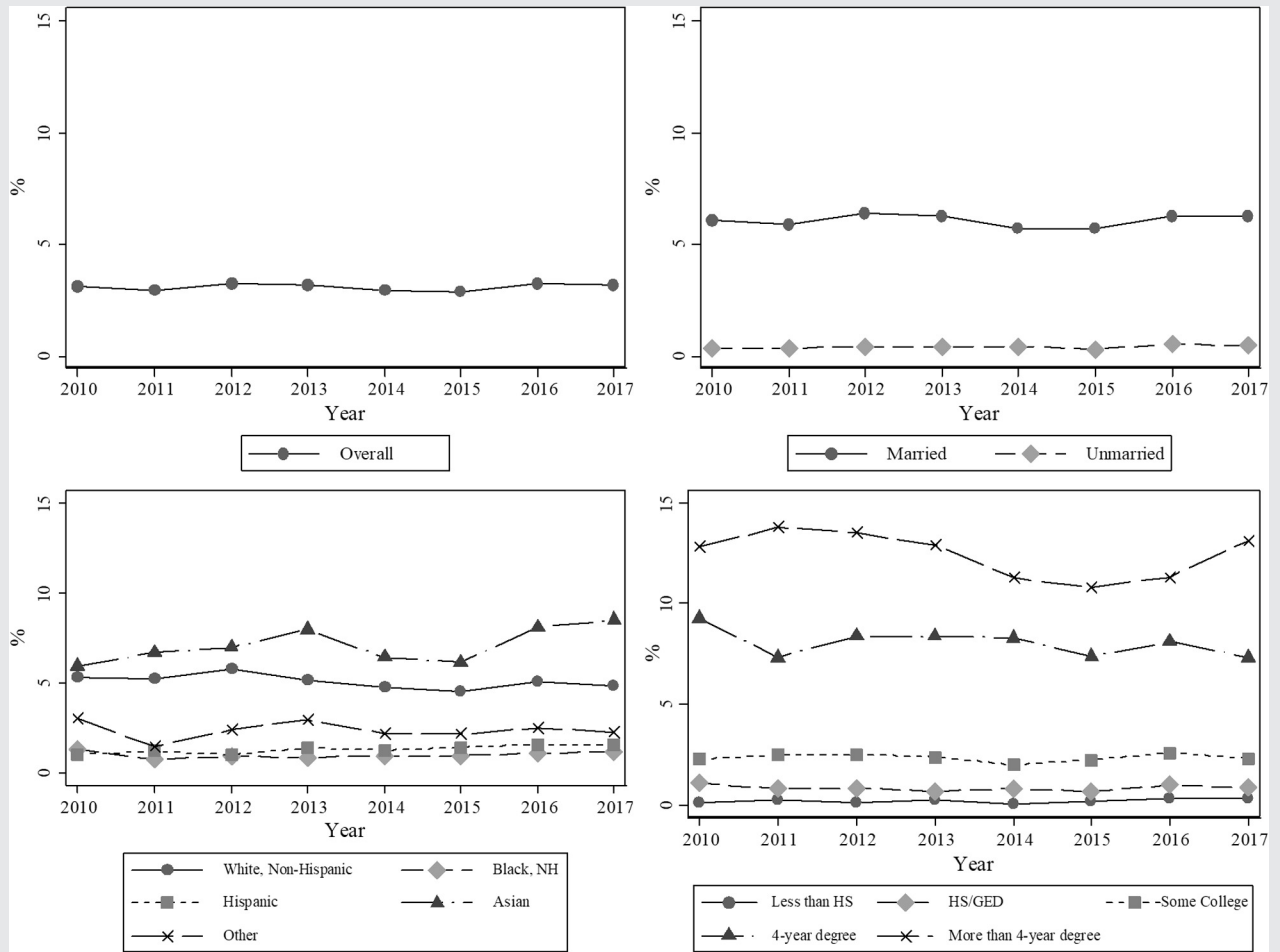

Percentage of fertility after age 30 due to ART overall and by race, marital status, and education including only early gestational births.

Tierney. ART use: a population assessment. *Fertil Steril* 2019.

**SUPPLEMENTAL FIGURE 4**

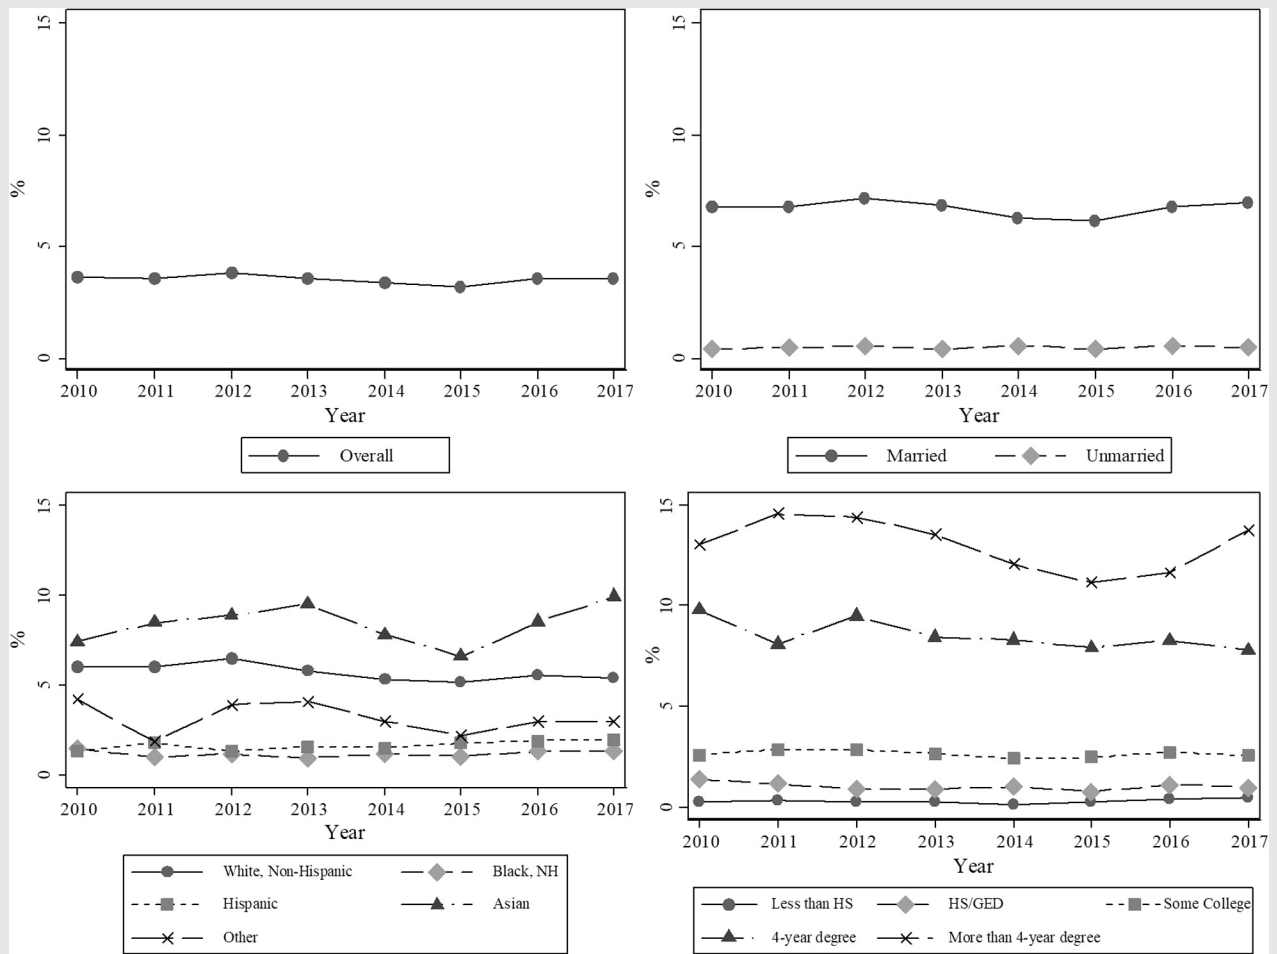

Percentage of after age 30 fertility due to ART overall and by race, marital status, and education including only low-birth-weight births.  
 Tierney. ART use: a population assessment. *Fertil Steril* 2019.
